# Supplementary material for: First observations of sea ice flexural–gravity waves with ground-based radar interferometry in Utqiaġvik, Alaska
Source: Copernicus journal article supplement (doi:10.5194/tc-17-1609-2023), 2023-04-13
Supplement: Supplementary file 1 [file tc-17-1609-2023-supplement.zip]

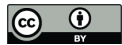

## *Supplement of*

# **First observations of sea ice flexural–gravity waves with ground-based radar interferometry in Utqiagvik, Alaska**

**Dyre Oliver Dammann et al.**

*Correspondence to:* Dyre Oliver Dammann ([dyre.dammann@ngi.no](mailto:dyre.dammann@ngi.no))

- [tc-17-1609-2023-supplement-title-page.pdf](#)
- [supplementary](#)
  - [Sup\\_fig\\_20210423\\_005602\\_-45.jpg](#)
  - [Sup\\_fig\\_20210423\\_005801\\_-135.jpg](#)
  - [Sup\\_fig\\_20210423\\_010801\\_-45.jpg](#)
  - [Sup\\_fig\\_20210423\\_011001\\_-135.jpg](#)
  - [Sup\\_fig\\_20210423\\_012001\\_-45.jpg](#)
  - [Sup\\_fig\\_20210423\\_012201\\_-135.jpg](#)
  - [Sup\\_fig\\_20210423\\_013201\\_-45.jpg](#)
  - [Sup\\_fig\\_20210423\\_013402\\_-135.jpg](#)
  - [Sup\\_fig\\_20210423\\_014401\\_-45.jpg](#)
  - [Sup\\_fig\\_20210423\\_014602\\_-135.jpg](#)
  - [Sup\\_fig\\_20210423\\_015601\\_-45.jpg](#)
  - [Sup\\_fig\\_20210423\\_015801\\_-135.jpg](#)
  - [Sup\\_fig\\_20210423\\_020801\\_-45.jpg](#)
  - [Sup\\_fig\\_20210423\\_021002\\_-135.jpg](#)
  - [Sup\\_fig\\_20210423\\_022001\\_-45.jpg](#)
  - [Sup\\_fig\\_20210423\\_022201\\_-135.jpg](#)
  - [Sup\\_fig\\_20210423\\_023201\\_-45.jpg](#)
  - [Sup\\_fig\\_20210423\\_023401\\_-135.jpg](#)
  - [Sup\\_fig\\_20210423\\_024401\\_-45.jpg](#)
  - [Sup\\_fig\\_20210423\\_024601\\_-135.jpg](#)
  - [Sup\\_fig\\_20210423\\_025601\\_-45.jpg](#)
  - [Sup\\_fig\\_20210423\\_025801\\_-135.jpg](#)
  - [Sup\\_fig\\_20210423\\_030802\\_-45.jpg](#)

- Sup\_fig\_20210423\_031001\_-135.jpg
- Sup\_fig\_20210423\_032001\_-45.jpg
- Sup\_fig\_20210423\_032201\_-135.jpg
- Sup\_fig\_20210423\_033201\_-45.jpg
- Sup\_fig\_20210423\_033401\_-135.jpg
- Sup\_fig\_20210423\_034401\_-45.jpg
- Sup\_fig\_20210423\_034601\_-135.jpg
- Sup\_fig\_20210423\_035601\_-45.jpg
- Sup\_fig\_20210423\_035801\_-135.jpg
- Sup\_fig\_20210423\_040801\_-45.jpg
- Sup\_fig\_20210423\_041001\_-135.jpg
- Sup\_fig\_20210423\_042001\_-45.jpg
- Sup\_fig\_20210423\_042201\_-135.jpg
- Sup\_fig\_20210423\_043201\_-45.jpg
- Sup\_fig\_20210423\_043401\_-135.jpg
- Sup\_fig\_20210423\_044401\_-45.jpg
- Sup\_fig\_20210423\_044601\_-135.jpg
- Sup\_fig\_20210423\_045601\_-45.jpg
- Sup\_fig\_20210423\_045801\_-135.jpg
- Sup\_fig\_20210423\_050801\_-45.jpg
- Sup\_fig\_20210423\_051002\_-135.jpg
- Sup\_fig\_20210423\_052001\_-45.jpg
- Sup\_fig\_20210423\_052201\_-135.jpg
- Sup\_fig\_20210423\_053201\_-45.jpg
- Sup\_fig\_20210423\_053401\_-135.jpg
- Sup\_fig\_20210423\_054401\_-45.jpg
- Sup\_fig\_20210423\_054601\_-135.jpg
- Sup\_fig\_20210423\_055601\_-45.jpg
- Sup\_fig\_20210423\_055801\_-135.jpg
- Sup\_fig\_20210423\_060801\_-45.jpg
- Sup\_fig\_20210423\_061001\_-135.jpg
- Sup\_fig\_20210423\_062001\_-45.jpg
- Sup\_fig\_20210423\_062201\_-135.jpg
- Sup\_fig\_20210423\_063201\_-45.jpg
- Sup\_fig\_20210423\_063401\_-135.jpg
- Sup\_fig\_20210423\_064401\_-45.jpg
- Sup\_fig\_20210423\_064601\_-135.jpg
- Sup\_fig\_20210423\_065601\_-45.jpg
- Sup\_fig\_20210423\_065801\_-135.jpg
- Sup\_fig\_20210423\_070801\_-45.jpg
- Sup\_fig\_20210423\_071001\_-135.jpg
- Sup\_fig\_20210423\_072002\_-45.jpg

- Sup\_fig\_20210423\_072202\_-135.jpg
- Sup\_fig\_20210423\_073201\_-45.jpg
- Sup\_fig\_20210423\_073401\_-135.jpg
- Sup\_fig\_20210423\_074401\_-45.jpg
- Sup\_fig\_20210423\_074601\_-135.jpg
- Sup\_fig\_20210423\_075601\_-45.jpg
- Sup\_fig\_20210423\_075801\_-135.jpg
- Sup\_fig\_20210423\_080801\_-45.jpg
- Sup\_fig\_20210423\_081001\_-135.jpg
- Sup\_fig\_20210423\_082001\_-45.jpg
- Sup\_fig\_20210423\_082201\_-135.jpg
- Sup\_fig\_20210423\_083201\_-45.jpg
- Sup\_fig\_20210423\_084401\_-45.jpg
- Sup\_fig\_20210423\_084601\_-135.jpg
- Sup\_fig\_20210423\_085601\_-45.jpg
- Sup\_fig\_20210423\_085801\_-135.jpg
- Sup\_fig\_20210423\_090801\_-45.jpg
- Sup\_fig\_20210423\_091002\_-135.jpg
- Sup\_fig\_20210423\_092001\_-45.jpg
- Sup\_fig\_20210423\_092201\_-135.jpg
- Sup\_fig\_20210423\_093201\_-45.jpg
- Sup\_fig\_20210423\_093401\_-135.jpg
- Sup\_fig\_20210423\_094401\_-45.jpg
- Sup\_fig\_20210423\_094601\_-135.jpg
- Sup\_fig\_20210423\_095601\_-45.jpg
- Sup\_fig\_20210423\_095801\_-135.jpg
- Sup\_fig\_20210423\_100801\_-45.jpg
- Sup\_fig\_20210423\_101002\_-135.jpg
- Sup\_fig\_20210423\_102001\_-45.jpg
- Sup\_fig\_20210423\_102201\_-135.jpg
- Sup\_fig\_20210423\_103201\_-45.jpg
- Sup\_fig\_20210423\_103401\_-135.jpg
- Sup\_fig\_20210423\_104401\_-45.jpg
- Sup\_fig\_20210423\_104601\_-135.jpg
- Sup\_fig\_20210423\_105601\_-45.jpg
- Sup\_fig\_20210423\_105801\_-135.jpg
- Sup\_fig\_20210423\_110801\_-45.jpg
- Sup\_fig\_20210423\_111002\_-135.jpg
- Sup\_fig\_20210423\_112001\_-45.jpg
- Sup\_fig\_20210423\_112201\_-135.jpg
- Sup\_fig\_20210423\_113201\_-45.jpg
- Sup\_fig\_20210423\_113401\_-135.jpg

- Sup\_fig\_20210423\_114401\_-45.jpg
- Sup\_fig\_20210423\_114601\_-135.jpg
- Sup\_fig\_20210423\_115601\_-45.jpg
- Sup\_fig\_20210423\_115801\_-135.jpg
- Sup\_fig\_20210423\_120801\_-45.jpg
- Sup\_fig\_20210423\_121001\_-135.jpg
- Sup\_fig\_20210423\_122001\_-45.jpg
- Sup\_fig\_20210423\_122201\_-135.jpg
- Sup\_fig\_20210423\_123201\_-45.jpg
- Sup\_fig\_20210423\_123401\_-135.jpg
- Sup\_fig\_20210423\_124401\_-45.jpg
- Sup\_fig\_20210423\_124601\_-135.jpg
- Sup\_fig\_20210423\_125601\_-45.jpg
- Sup\_fig\_20210423\_125801\_-135.jpg
- Sup\_fig\_20210423\_130801\_-45.jpg
- Sup\_fig\_20210423\_131002\_-135.jpg
- Sup\_fig\_20210423\_132001\_-45.jpg
- Sup\_fig\_20210423\_132201\_-135.jpg
- Sup\_fig\_20210423\_133201\_-45.jpg
- Sup\_fig\_20210423\_133401\_-135.jpg
- Sup\_fig\_20210423\_134401\_-45.jpg
- Sup\_fig\_20210423\_134601\_-135.jpg
- Sup\_fig\_20210423\_135601\_-45.jpg
- Sup\_fig\_20210423\_135801\_-135.jpg
- Sup\_fig\_20210423\_140801\_-45.jpg
- Sup\_fig\_20210423\_141001\_-135.jpg
- Sup\_fig\_20210423\_142001\_-45.jpg
- Sup\_fig\_20210423\_142201\_-135.jpg
- Sup\_fig\_20210423\_143201\_-45.jpg
- Sup\_fig\_20210423\_143401\_-135.jpg
- Sup\_fig\_20210423\_144401\_-45.jpg
- Sup\_fig\_20210423\_144601\_-135.jpg
- Sup\_fig\_20210423\_145601\_-45.jpg
- Sup\_fig\_20210423\_145801\_-135.jpg
- Sup\_fig\_20210423\_150801\_-45.jpg
- Sup\_fig\_20210423\_151002\_-135.jpg
- Sup\_fig\_20210423\_152001\_-45.jpg
- Sup\_fig\_20210423\_152201\_-135.jpg
- Sup\_fig\_20210423\_153201\_-45.jpg
- Sup\_fig\_20210423\_153401\_-135.jpg
- Sup\_fig\_20210423\_154401\_-45.jpg
- Sup\_fig\_20210423\_154602\_-135.jpg

- Sup\_fig\_20210423\_155601\_-45.jpg
- Sup\_fig\_20210423\_155801\_-135.jpg
- Sup\_fig\_20210423\_160801\_-45.jpg
- Sup\_fig\_20210423\_161002\_-135.jpg
- Sup\_fig\_20210423\_162001\_-45.jpg
- Sup\_fig\_20210423\_162201\_-135.jpg
- Sup\_fig\_20210423\_163201\_-45.jpg
- Sup\_fig\_20210423\_163401\_-135.jpg
- Sup\_fig\_20210423\_164401\_-45.jpg
- Sup\_fig\_20210423\_164601\_-135.jpg
- Sup\_fig\_20210423\_165601\_-45.jpg
- Sup\_fig\_20210423\_165801\_-135.jpg
- Sup\_fig\_20210423\_170801\_-45.jpg
- Sup\_fig\_20210423\_171001\_-135.jpg
- Sup\_fig\_20210423\_172001\_-45.jpg
- Sup\_fig\_20210423\_172201\_-135.jpg
- Sup\_fig\_20210423\_173201\_-45.jpg
- Sup\_fig\_20210423\_173401\_-135.jpg
- Sup\_fig\_20210423\_174401\_-45.jpg
- Sup\_fig\_20210423\_174601\_-135.jpg
- Sup\_fig\_20210423\_175601\_-45.jpg
- Sup\_fig\_20210423\_175801\_-135.jpg
- Sup\_fig\_20210423\_180801\_-45.jpg
- Sup\_fig\_20210423\_181002\_-135.jpg
- Sup\_fig\_20210423\_182001\_-45.jpg
- Sup\_fig\_20210423\_182201\_-135.jpg
- Sup\_fig\_20210423\_183201\_-45.jpg
- Sup\_fig\_20210423\_183401\_-135.jpg
- Sup\_fig\_20210423\_184401\_-45.jpg
- Sup\_fig\_20210423\_184601\_-135.jpg
- Sup\_fig\_20210423\_185601\_-45.jpg
- Sup\_fig\_20210423\_185801\_-135.jpg
- Sup\_fig\_20210423\_190801\_-45.jpg
- Sup\_fig\_20210423\_191002\_-135.jpg
- Sup\_fig\_20210423\_192002\_-45.jpg
- Sup\_fig\_20210423\_192201\_-135.jpg
- Sup\_fig\_20210423\_193201\_-45.jpg
- Sup\_fig\_20210423\_193401\_-135.jpg
- Sup\_fig\_20210423\_194401\_-45.jpg
- Sup\_fig\_20210423\_194601\_-135.jpg
- Sup\_fig\_20210423\_195601\_-45.jpg
- Sup\_fig\_20210423\_195801\_-135.jpg

- Sup\_fig\_20210423\_200802\_-45.jpg
- Sup\_fig\_20210423\_201002\_-135.jpg
- Sup\_fig\_20210423\_202001\_-45.jpg
- Sup\_fig\_20210423\_202201\_-135.jpg
- Sup\_fig\_20210423\_203202\_-45.jpg
- Sup\_fig\_20210423\_203401\_-135.jpg
- Sup\_fig\_20210423\_204401\_-45.jpg
- Sup\_fig\_20210423\_204601\_-135.jpg
- Sup\_fig\_20210423\_205601\_-45.jpg
- Sup\_fig\_20210423\_205801\_-135.jpg
- Sup\_fig\_20210423\_210801\_-45.jpg
- Sup\_fig\_20210423\_211002\_-135.jpg
- Sup\_fig\_20210423\_212001\_-45.jpg
- Sup\_fig\_20210423\_212201\_-135.jpg
- Sup\_fig\_20210423\_213201\_-45.jpg
- Sup\_fig\_20210423\_213401\_-135.jpg
- Sup\_fig\_20210423\_214401\_-45.jpg
- Sup\_fig\_20210423\_214601\_-135.jpg
- Sup\_fig\_20210423\_215601\_-45.jpg
- Sup\_fig\_20210423\_215801\_-135.jpg
- Sup\_fig\_20210423\_220801\_-45.jpg
- Sup\_fig\_20210423\_221002\_-135.jpg
- Sup\_fig\_20210423\_222001\_-45.jpg
- Sup\_fig\_20210423\_222201\_-135.jpg
- Sup\_fig\_20210423\_223202\_-45.jpg
- Sup\_fig\_20210423\_223401\_-135.jpg
- Sup\_fig\_20210423\_224402\_-45.jpg
- Sup\_fig\_20210423\_224602\_-135.jpg
- Sup\_fig\_20210423\_225601\_-45.jpg
- Sup\_fig\_20210423\_225802\_-135.jpg
- Sup\_fig\_20210423\_230801\_-45.jpg
- Sup\_fig\_20210423\_231001\_-135.jpg
- Sup\_fig\_20210423\_232002\_-45.jpg
- Sup\_fig\_20210423\_232202\_-135.jpg
- Sup\_fig\_20210423\_233201\_-45.jpg
- Sup\_fig\_20210423\_233402\_-135.jpg
- Sup\_fig\_20210423\_234401\_-45.jpg
- Sup\_fig\_20210423\_234601\_-135.jpg
- Sup\_fig\_20210423\_235602\_-45.jpg
- Sup\_fig\_20210423\_235801\_-135.jpg
- Sup\_fig\_20210424\_000801\_-45.jpg
- Sup\_fig\_20210424\_001001\_-135.jpg

- Sup\_fig\_20210424\_002001\_-45.jpg
- Sup\_fig\_20210424\_002202\_-135.jpg
- Sup\_fig\_20210424\_003201\_-45.jpg
- Sup\_fig\_20210424\_003402\_-135.jpg
- Sup\_fig\_20210424\_004401\_-45.jpg

The copyright of individual parts of the supplement might differ from the article licence.
